# Supplementary material for: Fragile X mental retardation protein promotes astrocytoma proliferation via the MEK/ERK signaling pathway
Source: PubMed Central journal article supplement (PMC5342749; doi:10.18632/oncotarget.12215), 2016-09-23
Supplement: oncotarget-07-75394-s001.pdf [file oncotarget-07-75394-s001.pdf]

## Fragile X mental retardation protein promotes astrocytoma proliferation via the MEK/ERK signaling pathway

### SUPPLEMENTARY TABLE

Supplementary Table S1: Oligonucleotide sequence of siRNAs.

| siRNA        | sense                       | antisense                   |
|--------------|-----------------------------|-----------------------------|
| FMRP siRNA-1 | 5'-GCAGCCUGAUAGGCAGAUU-3'   | 5'-AAUCUGCCUAUCAGGCUGC-3'   |
| FMRP siRNA-2 | 5'-GCAGCUUGCCUCGAGAUUU-3'   | 5'-AAAUCUCGAGGCAAGCUGC- 3'  |
| GFP siRNA    | 5'-UAGCGACUAAACACAUCAATT-3' | 5'-UUGAUGUGUUUAGUCGCUATT-3' |
